# Supplementary material
Source: PubMed Central journal article supplement (PMC3457409)

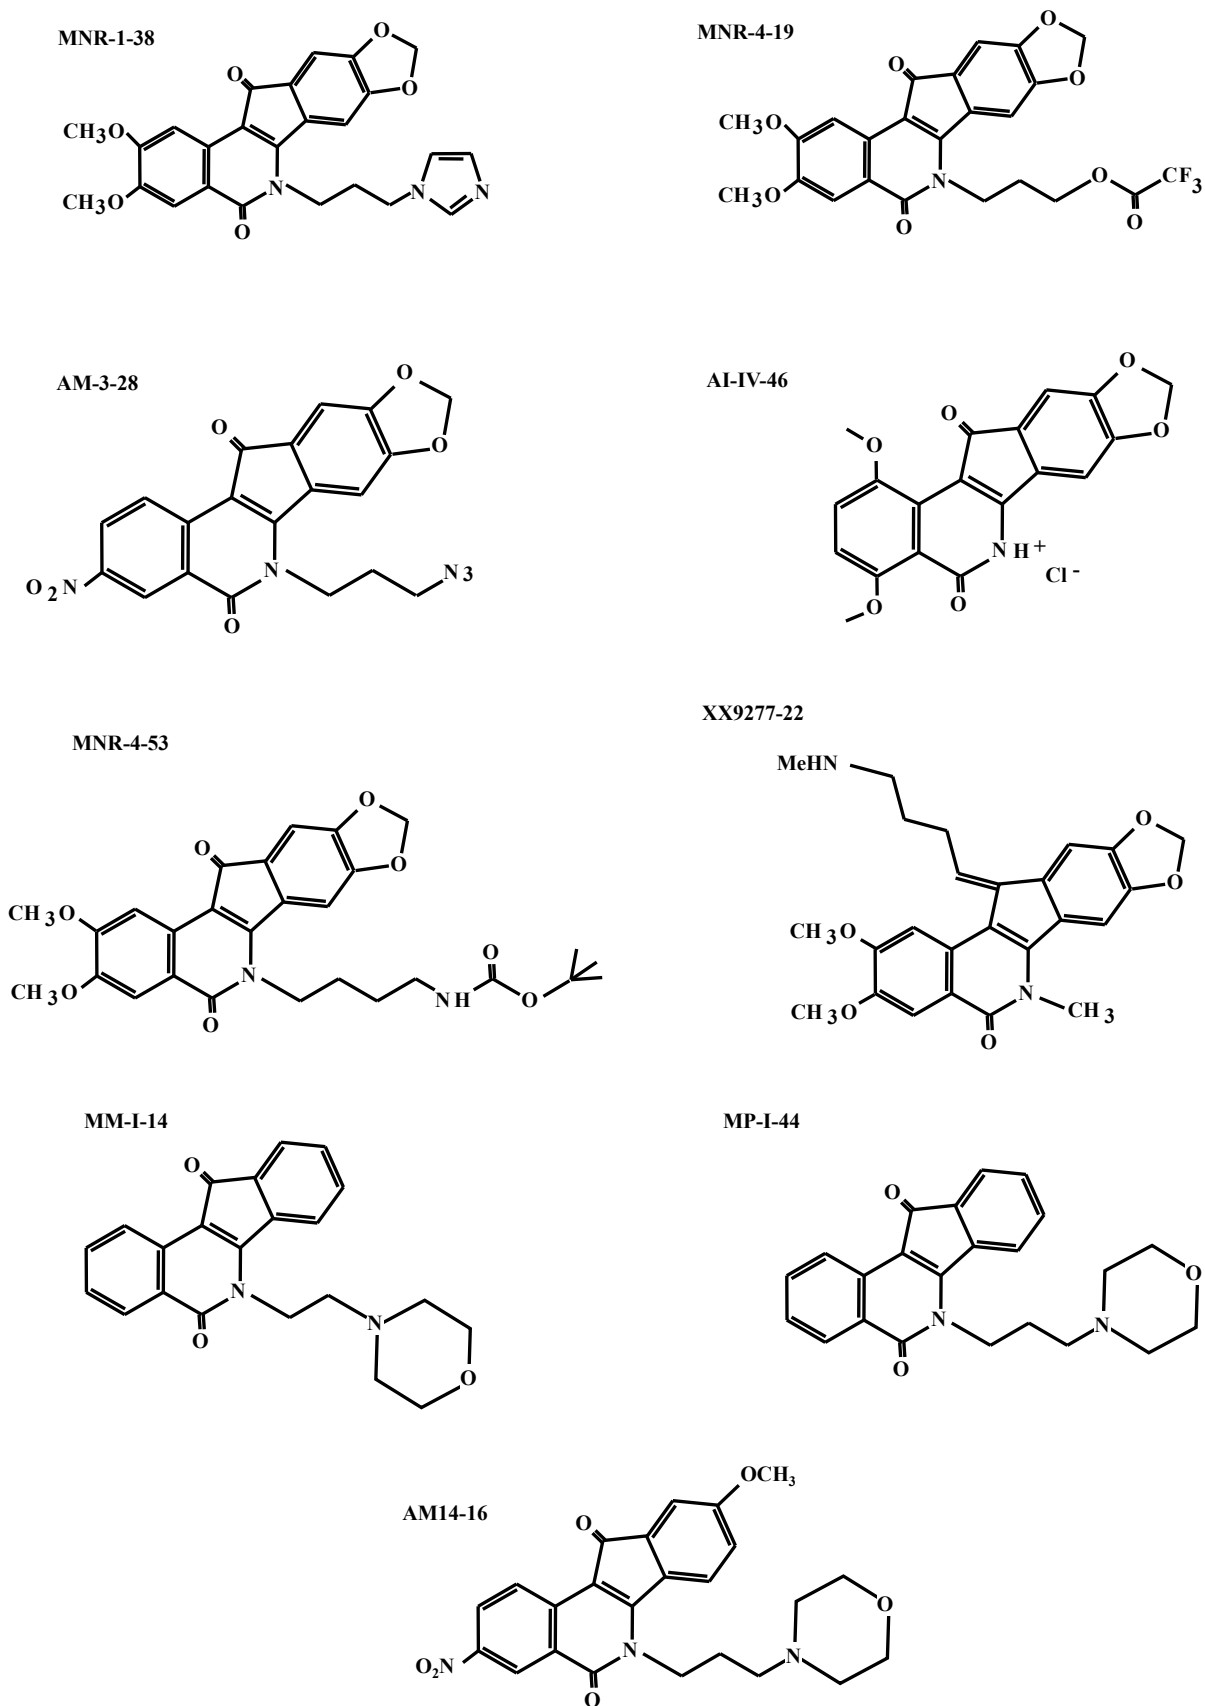

**Fig. S1.** Chemical structures of the indenoisoquinolines discarded in the first screening phase.

Supplement: AAC.00499-12_zac999101260so1.pdf [file AAC.00499-12_zac999101260so1.pdf]
